# Supplementary material for: Highly broadband NLO response of acceptor–donor–acceptor materials with a planar conformation
Source: Royal Society of Chemistry journal article supplement (doi:10.1039/d0ma00918k), 2021-01-01
Supplement: d0ma00918k1.pdf [file d0ma00918k1.pdf]

## Highly Broadband NLO Response of Acceptor-Donor-Acceptor Material with Planar Conformation

Yulin Huang,<sup>a,b</sup> Wenfa Zhou,<sup>c,d</sup> Xiaofang Li,<sup>b</sup> Li Jiang<sup>\*a,e</sup> and Yinglin Song<sup>\*c,d</sup>

<sup>a</sup> Beijing National Laboratory for Molecular Sciences, Key Laboratory of Molecular Nanostructure and Nanotechnology, Institute of Chemistry, Chinese Academy of Sciences, Beijing 100190, China. E-mail: jiangli@iccas.ac.cn

<sup>b</sup> Key Laboratory of Theoretical Organic Chemistry and Functional Molecules, Ministry of Education, School of Chemistry and Chemical Engineering, Hunan University of Science and Technology, Xiangtan, Hunan 411201, China.

<sup>c</sup> Department of Physics, Harbin Institute of Technology, Harbin 150001, China

<sup>d</sup> School of Optoelectronic Science and Engineering, Soochow University, Suzhou 215006, China. E-mail: ylsong@hit.edu.cn

<sup>e</sup> University of Chinese Academy of Sciences, Beijing 100049, China

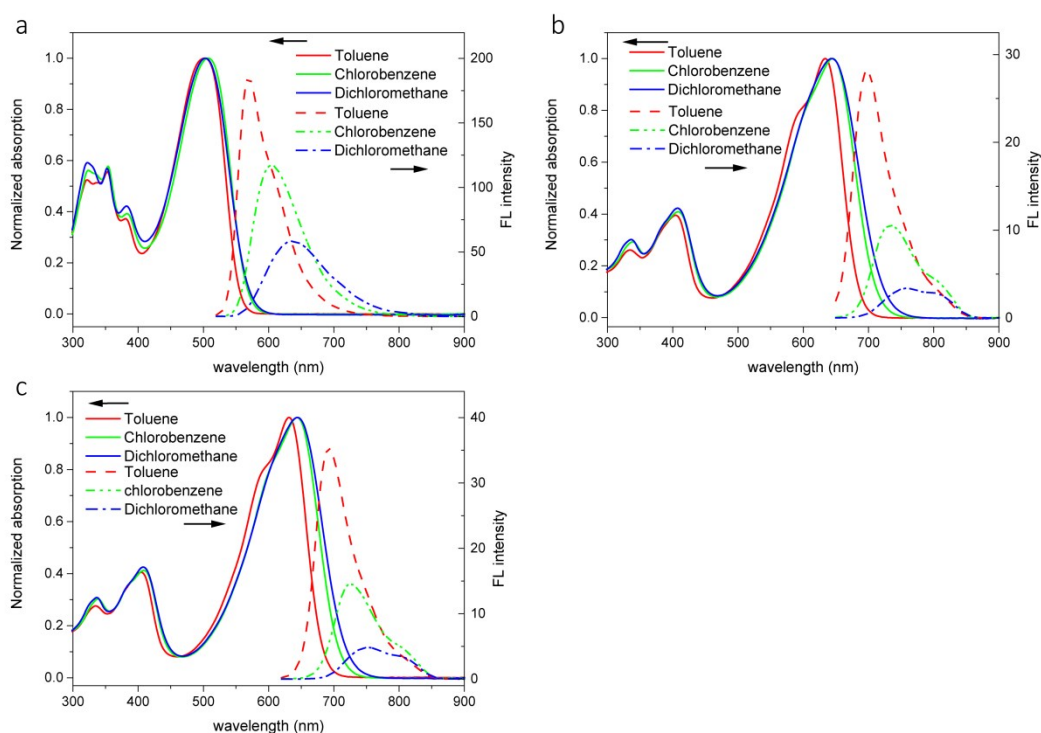

Figure S1. UV-Vis absorption (solid lines) and emission spectra (dash line) in dilute different polarity solvents (Toluene < Chlorobenzene < Dichloromethane). a is IDFBR; b is O-IDTBR; c is EH-IDTBR.

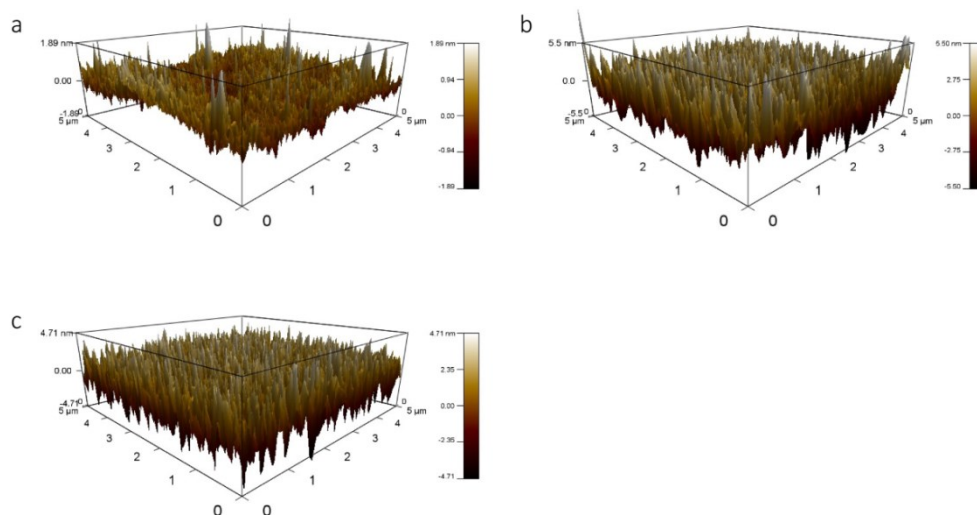

Figure S2. AFM 3D images of (a) IDFBR, (b) O-IDTBR and (c) EH-IDTBR on silicon wafer in the  $5\mu\text{m} \times 5\mu\text{m}$  region.

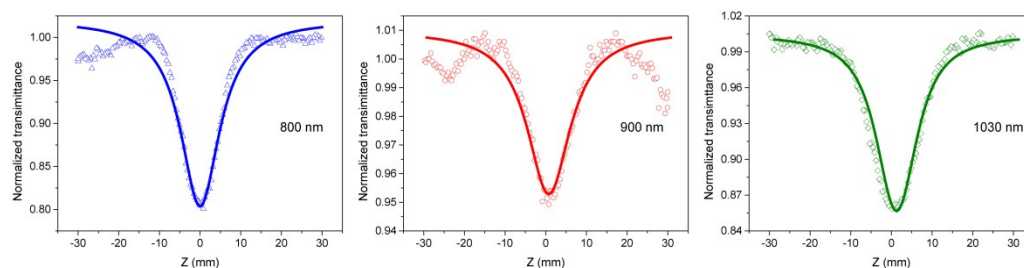

Figure S3. Femtosecond open aperture Z-scan curves of EH-IDTBR at 800 nm, 900 nm and 1030 nm in toluene solvent.

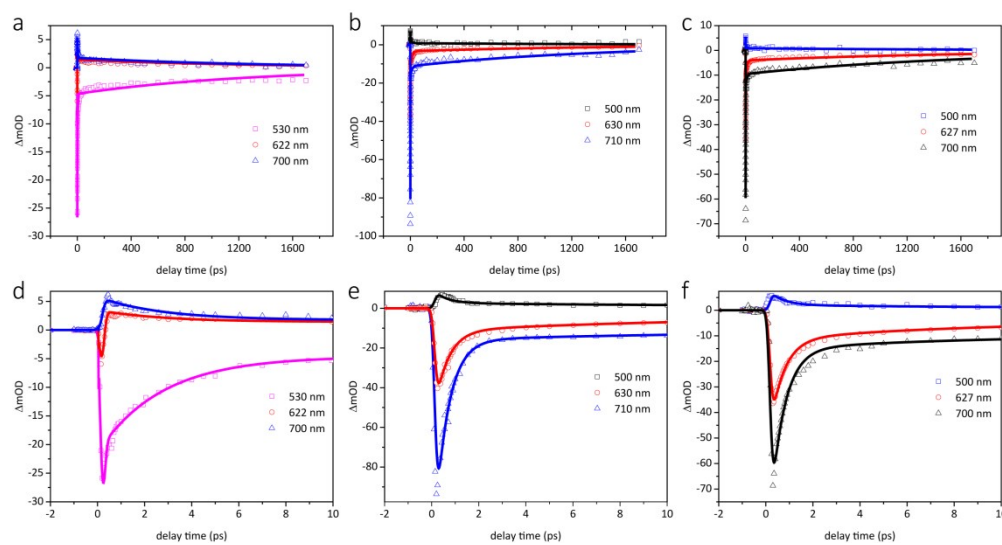

Figure S4. Dynamic traces of IDFBR (a, d), O-IDTBR (b, e) and EH-IDTBR (c, f) at long delay time and short delay time. Solid lines are theoretical fitting and circles are experimental data..

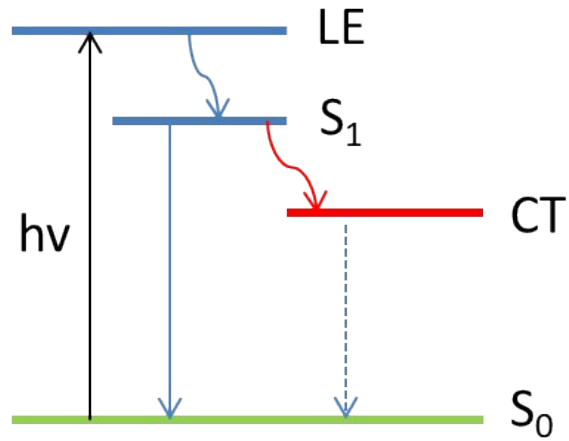

Figure S5. The proposed target model diagram of samples after photoexcitation

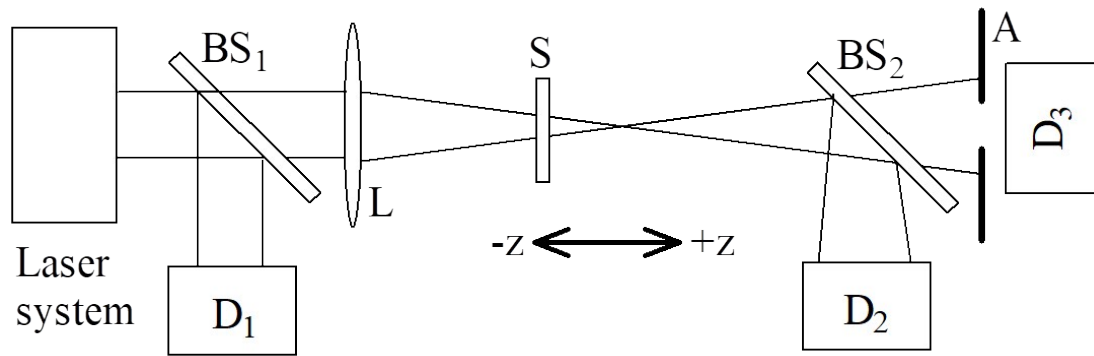

Figure S6. The Z-scan measured apparatus.  $BS_1$ ,  $BS_2$ , beam splitter; L, lens; S, sample; A, aperture;  $D_1$ - $D_3$ , energy detectors

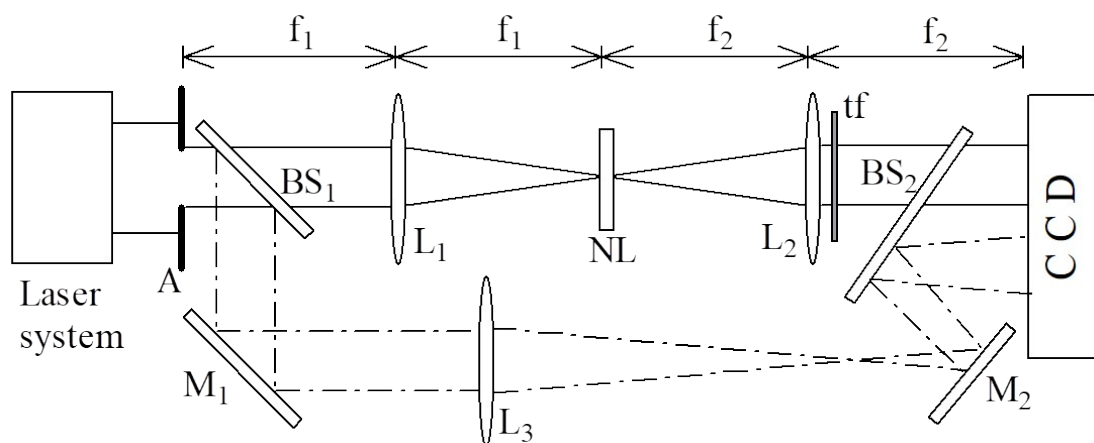

Figure S7. Schematic of 4f coherent imaging technique. A is the aperture with PO; NL, the nonlinear sample;  $L_1$ - $L_3$ , lenses;  $M_1$ - $M_2$ , mirrors;  $BS_1$ - $BS_2$ , beam splitters;  $tf$ , neutral filter.
